# Supplementary material for: Switchable modulation of bacterial growth and biofilm formation based on supramolecular tripeptide amphiphiles
Source: Royal Society of Chemistry journal article supplement (doi:10.1039/c9tb00973f), 2019-01-01
Supplement: c9tb00973f1.pdf [file c9tb00973f1.pdf]

## **Switchable modulation of bacterial growth and biofilm formation based on supramolecular tripeptide amphiphiles**

Limin Chen,<sup>ab#</sup> Dan Yang,<sup>a#</sup> Jie Feng,<sup>b</sup> Min Zhang,<sup>a</sup> Qiuping Qian,<sup>b</sup> and Yunlong Zhou<sup>\*ab</sup>

<sup>a</sup> School of Ophthalmology and Optometry, Eye Hospital, School of Biomedical Engineering, Wenzhou Medical University, Wenzhou 325000, P. R. China

<sup>b</sup> Engineering Research Center of Clinical Functional Materials and Diagnosis & Treatment Devices of Zhejiang Province, Wenzhou Institute, University of Chinese Academy of Sciences, Wenzhou 325000, P. R. China

<sup>#</sup> These authors contributed equally to this work.

E-mail: \*zhouyl@wibe.ac.cn (Y. L. Z.)

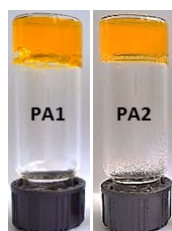

**Fig. S1** Photograph of hydrogels assembled from 7 mM of PA1 and PA2 in PBS solution (pH 7.4).

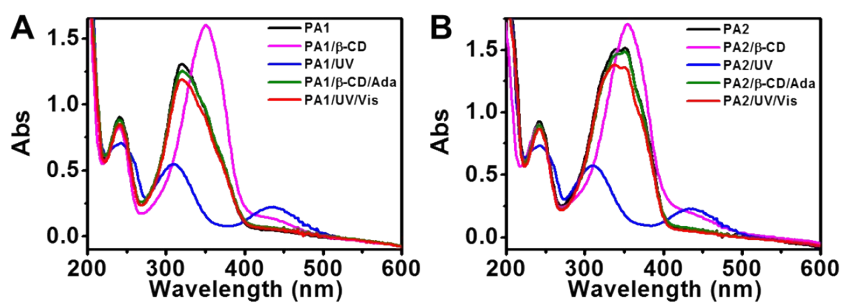

**Fig. S2** UV-Vis spectra of 0.7 mM of PA1 and PA2 in PBS solution (pH 7.4) upon response to light or host-guest interaction.

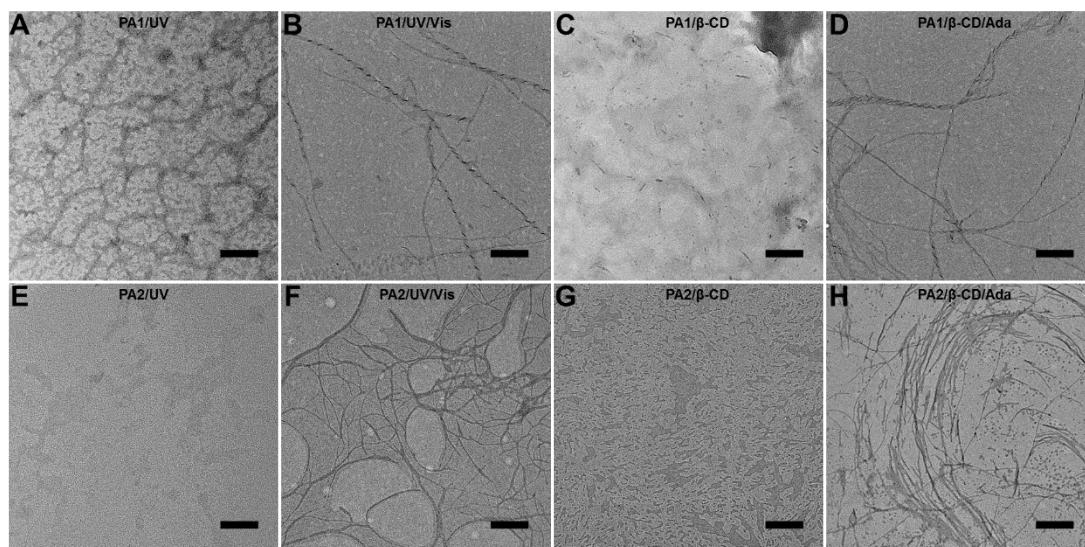

**Fig. S3** TEM images show the disassembly-to-assembly process of PA1 and PA2 upon response to light or host-guest interaction. The scale bars are 500 nm.

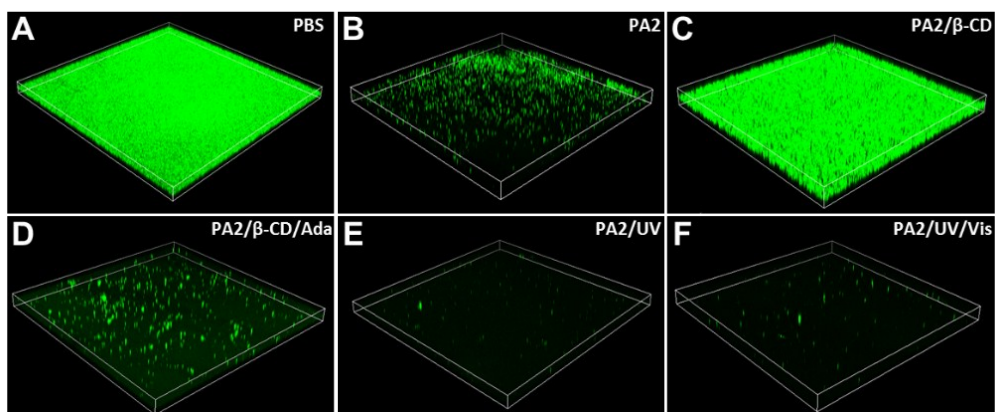

**Fig. S4** 3D CLSM imaging of supramolecular/photo controllable biofilm inhibitory potency of PA2 against *S. aureus* at 37 °C in the dark for 24 h after staining with SYTO9 (The size of each CLSM image is 1272  $\mu\text{m}$   $\times$  1272  $\mu\text{m}$ ).

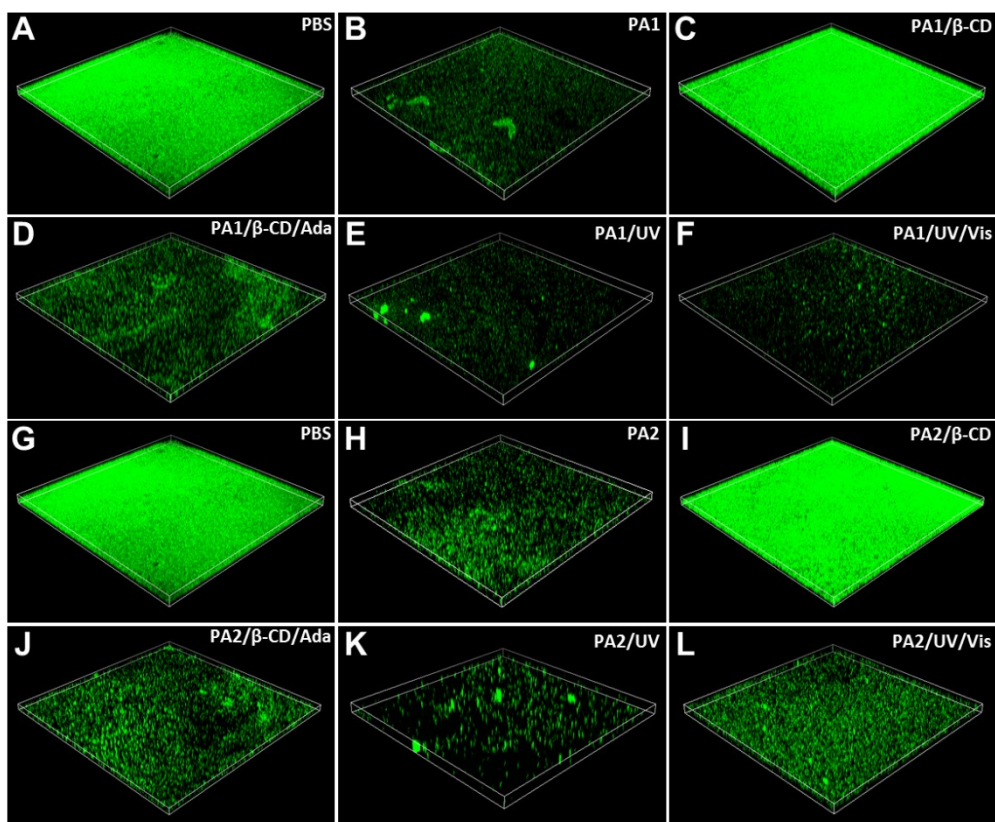

**Fig. S5** 3D CLSM imaging of supramolecular/photo controllable biofilm inhibitory potency of PA1 and PA2 against *P. aeruginosa* at 37 °C in the dark for 24 h after staining with SYTO9 (The size of each CLSM image is 1272  $\mu\text{m}$   $\times$  1272  $\mu\text{m}$ ).

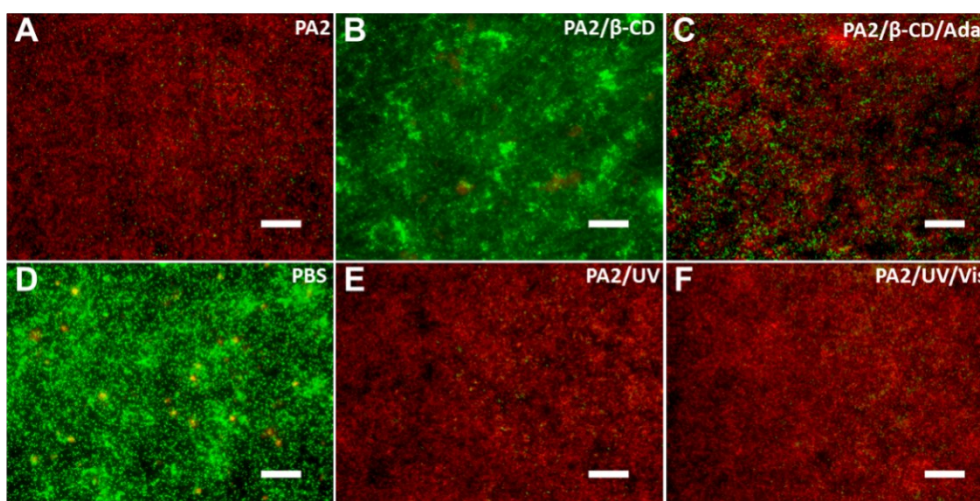

**Fig. S6** Fluorescent imaging of the preformed *S. aureus* biofilms after treatment of 0.35 mM of PA2, PA2/ $\beta$ -CD, PA2/ $\beta$ -CD/Ada, PA2/UV or PA2/UV/Vis at 37 °C in dark for 24 h after staining with LIVE/DEAD™ BacLight™ Bacterial Viability Kit (live cells appear green, dead cells appear red; scale bar = 20  $\mu$ m).

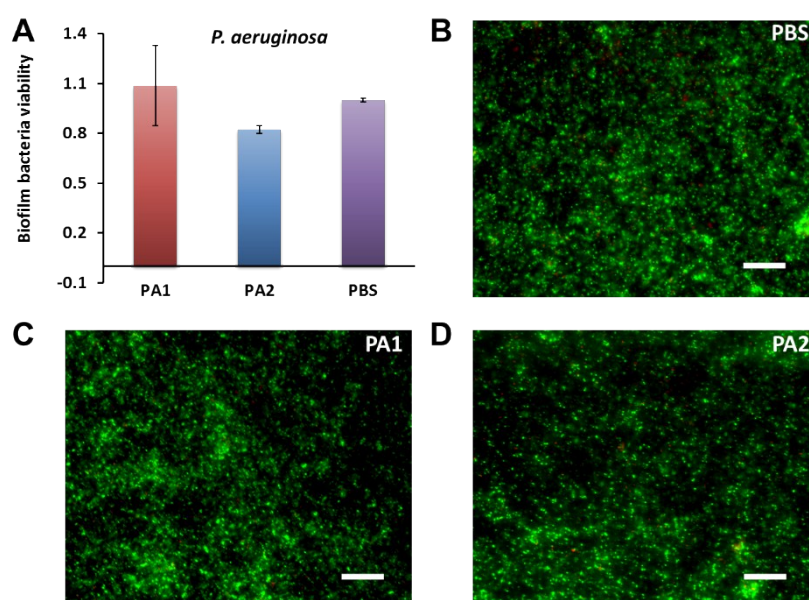

**Fig. S7** (A) Quantitative analysis of the metabolic activity of the preformed *P. aeruginosa* biofilms after exposure to 0.35 mM of **PA1** or **PA2** at 37 °C in the dark for 24 h via an XTT reduction assay. (B-D) Fluorescent imaging of the preformed *S. aureus* biofilms after treatment of 0.35 mM of **PA1** or **PA2** at 37 °C in dark for 24 h after staining with LIVE/DEAD™ BacLight™ Bacterial Viability Kit (live cells appear green, dead cells appear red; scale bar = 20 µm).

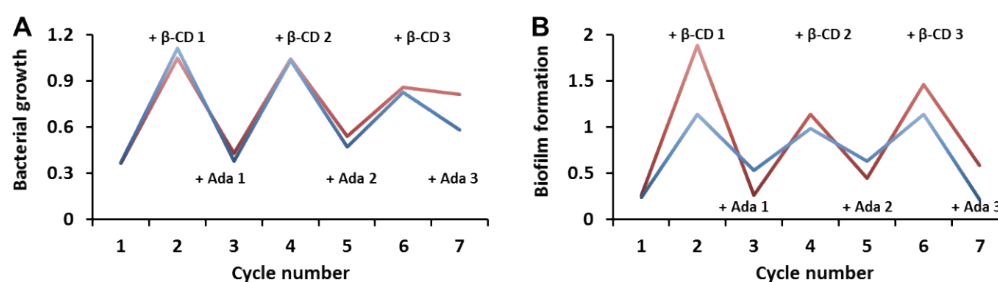

**Fig. S8** Switchable antibacterial (A) and antibiofilm (B) activities of PA1 (red) and PA2 (blue) against *S. aureus* upon host-guest interaction for 3 cycles.

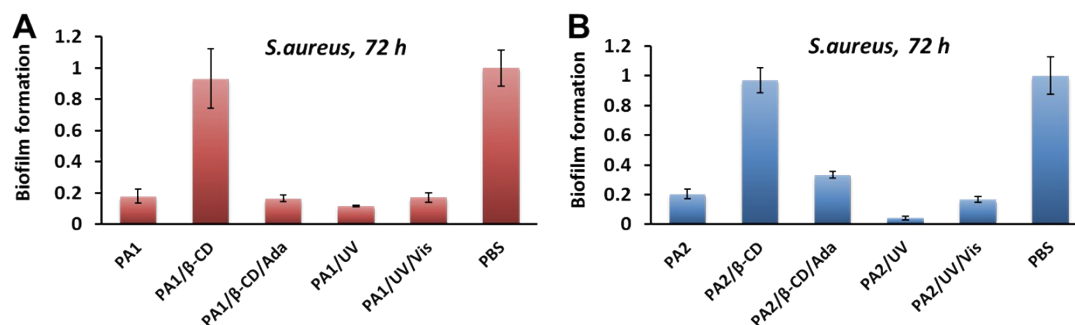

**Fig. S9** Quantitative analysis of supramolecular/photo controllable biofilm inhibitory potency of PA1 and PA2 against *S. aureus* at 37 °C in dark for 72 h by recording the OD<sub>550</sub> of crystal violet-treated biofilms.

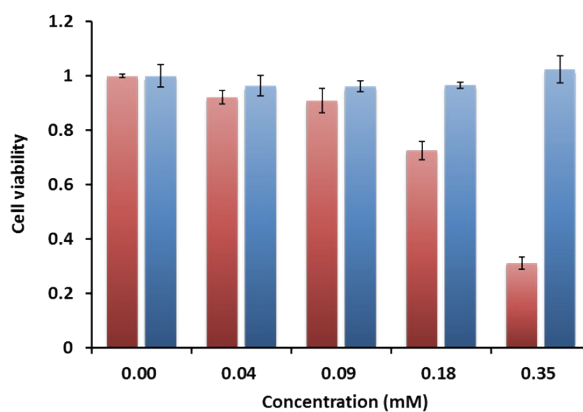

**Fig. S10** Cytotoxicity of PA1 (red column) and PA2 (blue column) toward L929 cells at 37 °C for 24 h by Cell Counting Kit-8 assay. PA1 exhibits dose-dependent cytotoxicity against L929 cells, while PA2 shows good cytocompatibility.
